# Supplementary material
Source: PubMed Central journal article supplement (PMC3249074)
Supplement: supp_M111.279281_jbc.M111.279281-1.pdf [file supp_M111.279281_jbc.M111.279281-1.pdf]

Supplementary Table 1. Structural statistics for the 20 lowest energy structures.

| # Restraints                     | Z2-DPC-d <sub>38</sub>                        | Z8-DPC-d <sub>38</sub>                        | Z8-SDS-d <sub>25</sub>                        | Z9-DPC-d <sub>38</sub>                       | Z9-SDS-d <sub>25</sub>                        |
|----------------------------------|-----------------------------------------------|-----------------------------------------------|-----------------------------------------------|----------------------------------------------|-----------------------------------------------|
| Unambiguous nOes                 | 296                                           | 455                                           | 358                                           | 343                                          | 374                                           |
| Ambiguous nOes                   | 27                                            | 52                                            | 81                                            | 56                                           | 70                                            |
| Unassigned nOes                  | 0                                             | 0                                             | 0                                             | 0                                            | 0                                             |
| Total nOes                       | 323                                           | 507                                           | 439                                           | 399                                          | 444                                           |
| # Dihedral Restraints            | 20                                            | 20                                            | 20                                            | 20                                           | 20                                            |
| RMSD from ideal <sup>a</sup>     |                                               |                                               |                                               |                                              |                                               |
| Bonds (Å)                        | $8.97 \times 10^{-4} \pm 7.81 \times 10^{-5}$ | $5.97 \times 10^{-3} \pm 9.22 \times 10^{-5}$ | $3.85 \times 10^{-3} \pm 5.46 \times 10^{-5}$ | $8.84 \times 10^{-4} \pm 5.1 \times 10^{-5}$ | $3.96 \times 10^{-3} \pm 3.1 \times 10^{-4}$  |
| Angles (Å)                       | $0.29 \pm 2.82 \times 10^{-3}$                | $0.54 \pm 1.17 \times 10^{-2}$                | $0.393 \pm 5.27 \times 10^{-3}$               | $0.274 \pm 2.2 \times 10^{-3}$               | $0.420 \pm 1.9 \times 10^{-2}$                |
| Impropers (deg)                  | $0.128 \pm 6.66 \times 10^{-3}$               | $0.45 \pm 1.54 \times 10^{-2}$                | $0.21 \pm 4.82 \times 10^{-3}$                | $9.93 \times 10^{-2} \pm 7.3 \times 10^{-3}$ | $0.256 \pm 2.5 \times 10^{-2}$                |
| VDW (kcal·mol <sup>-1</sup> )    | $6.90 \pm 0.69$                               | $39.03 \pm 2.45$                              | $9.56 \pm 0.66$                               | $4.98 \pm 0.6$                               | $14.7 \pm 0.92$                               |
| Distance Restraints              |                                               |                                               |                                               |                                              |                                               |
| Unambiguous                      | $6.37 \times 10^{-2} \pm 3.90 \times 10^{-2}$ | $6.67 \times 10^{-2} \pm 1.91 \times 10^{-2}$ | $6.10 \times 10^{-2} \pm 2.48 \times 10^{-2}$ | $8.84 \times 10^{-2} \pm 1.7 \times 10^{-2}$ | $4.60 \times 10^{-2} \pm 1.8 \times 10^{-2}$  |
| Ambiguous                        | $6.09 \times 10^{-3} \pm 1.33 \times 10^{-2}$ | $1.05 \times 10^{-2} \pm 1.84 \times 10^{-3}$ | $5.97 \times 10^{-3} \pm 9.12 \times 10^{-3}$ | $8.05 \times 10^{-3} \pm 1.1 \times 10^{-2}$ | $6.673 \times 10^{-3} \pm 5.1 \times 10^{-3}$ |
| All dist. restraints             | $6.09 \times 10^{-2} \pm 3.69 \times 10^{-2}$ | $6.34 \times 10^{-2} \pm 1.80 \times 10^{-2}$ | $5.55 \times 10^{-2} \pm 2.22 \times 10^{-2}$ | $8.20 \times 10^{-2} \pm 1.6 \times 10^{-2}$ | $4.228 \times 10^{-2} \pm 1.6 \times 10^{-2}$ |
| Dihedral restraints (deg)        | $2.08 \times 10^{-2} \pm 3.33 \times 10^{-2}$ | $0.66 \pm 0.25$                               | $2.63 \times 10^{-2} \pm 4.00 \times 10^{-2}$ | $1.00 \times 10^{-2} \pm 2.5 \times 10^{-2}$ | -                                             |
| Nonbonded energies               |                                               |                                               |                                               |                                              |                                               |
| Elect. (kcal·mol <sup>-1</sup> ) | $-543.54 \pm 36.94$                           | $-467.98 \pm 52.09$                           | $-513.94 \pm 34.36$                           | $-458.82 \pm 49.8$                           | $-493.37 \pm 35.6$                            |
| VDW (kcal·mol <sup>-1</sup> )    | $-150.63 \pm 4.02$                            | $-173.70 \pm 3.67$                            | $-165.41 \pm 2.83$                            | $-156.41 \pm 4.0$                            | $-166.84 \pm 2.0$                             |
| Ramachandran (%) <sup>b, c</sup> |                                               |                                               |                                               |                                              |                                               |
| Most favoured                    | 54.5                                          | 55.8                                          | 87.4                                          | 58.4                                         | 49.7                                          |
| Additionally allowed             | 45.5                                          | 44.2                                          | 12.6                                          | 41.6                                         | 50.3                                          |
| Generously allowed               | 0                                             | 0                                             | 0                                             | 0                                            | 0                                             |
| Disallowed                       | 0                                             | 0                                             | 0                                             | 0                                            | 0                                             |
| Global RMSD <sup>d</sup>         |                                               |                                               |                                               |                                              |                                               |
| Backbone                         | (res. 3-19) 0.991                             | (res. 2-20) 0.514                             | (res. 4-17) 0.996                             | (res. 4-19) 0.849                            | (res. 4-19) 0.633                             |
| Heavy atoms                      | (res. 3-19) 1.364                             | (res. 2-20) 0.928                             | (res. 4-17) 1.587                             | (res. 4-19) 1.428                            | (res. 4-19) 1.027                             |

a) The data in the Table are taken directly from the PROCHECK (41, 42) software output and do not imply an extremely high level of accuracy in the RMSD; b) Determined using PROCHECK (41,42); c) The relatively large number of residues that have backbone conformations in the additionally allowed regions, is quite frequently seen for structural ensembles of such linear helical peptides; typically these arise from residues near the N- and C-termini of the peptide, where the backbone structure is less well defined; d) Determined using MOLMOL (40).
